# Supplementary material
Source: PubMed Central journal article supplement (PMC2386857)

Supplementary Figure-1

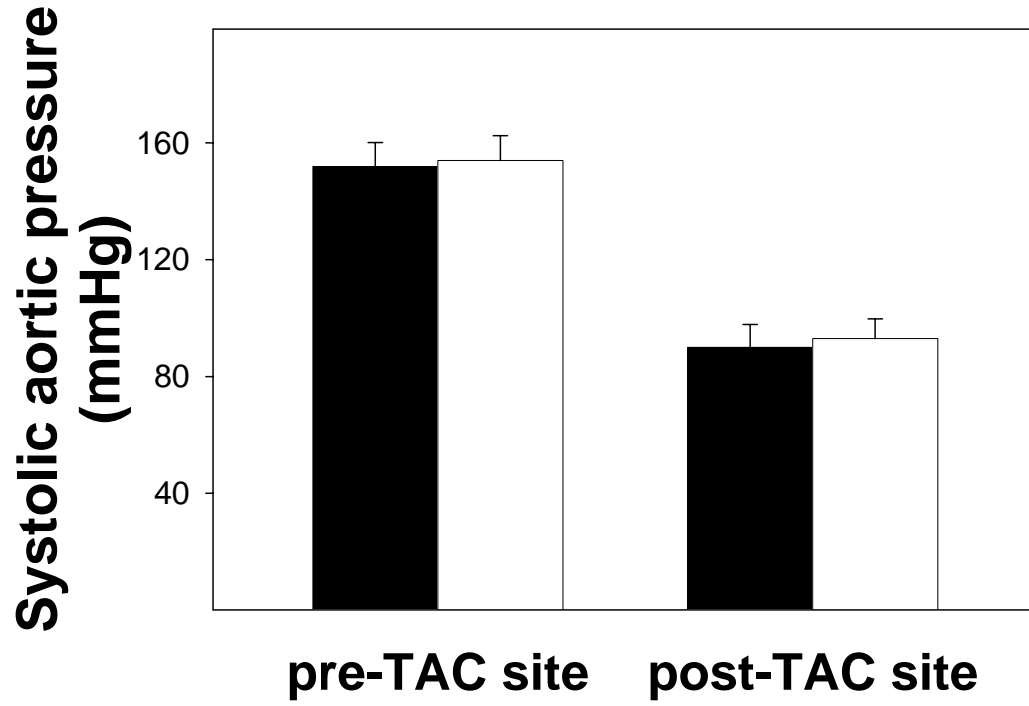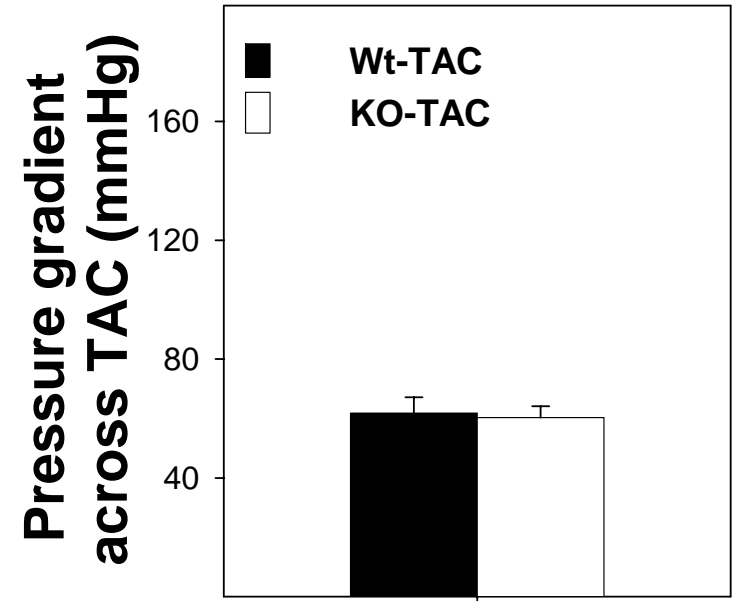

Supplementary Figure-2

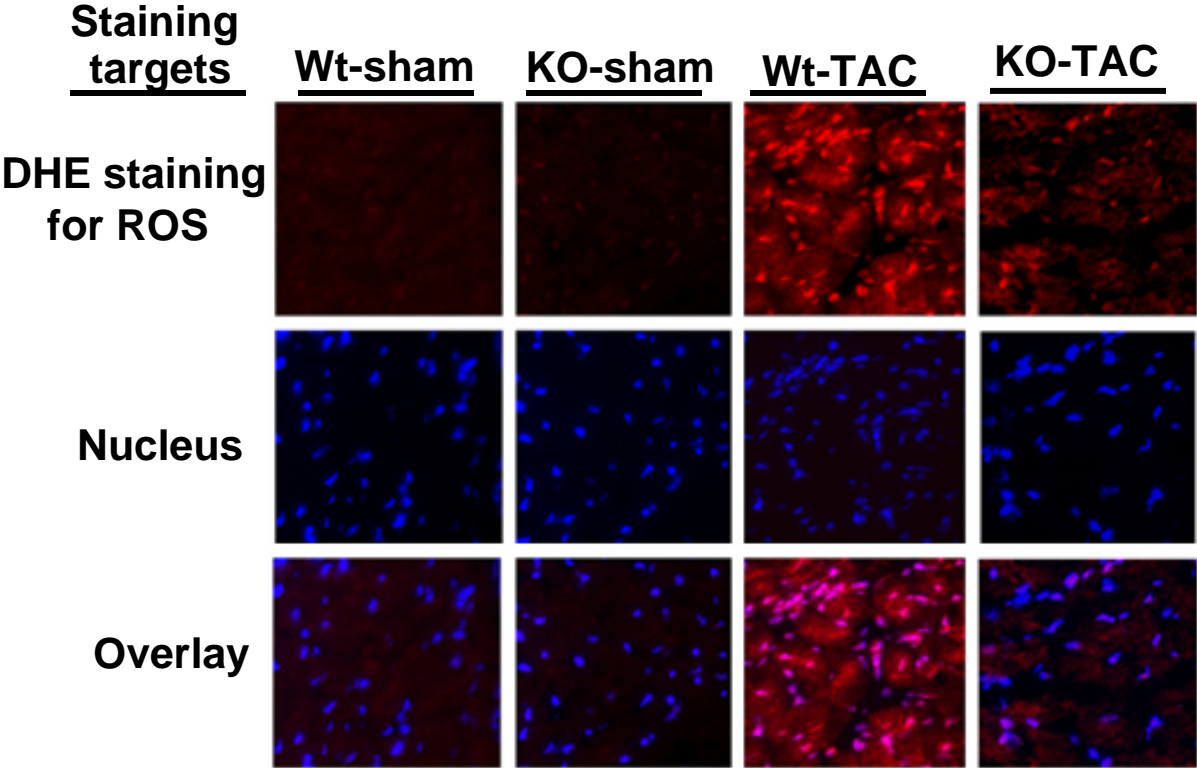

Supplementary Figure-3

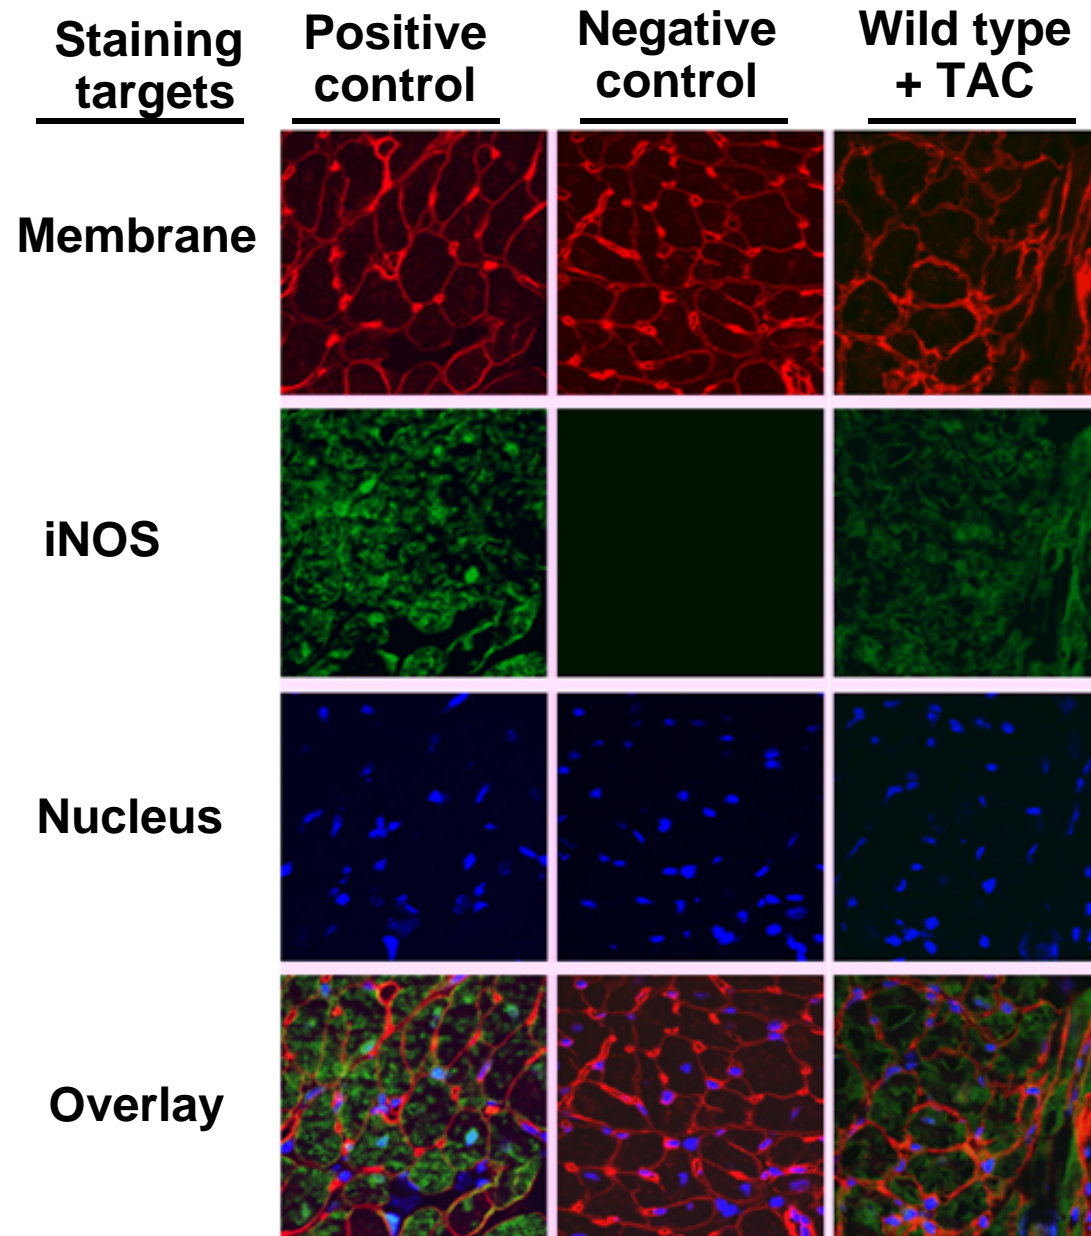

Supplement: NIHMS46310-supplement-01.pdf [file NIHMS46310-supplement-01.pdf]
